# Supplementary material for: Alkaline electrolyte: toward high-quality CdTe films with the assistance of strong complexing agent and organic base
Source: Royal Society of Chemistry journal article supplement (doi:10.1039/c7ce01816a), 2017-11-23
Supplement: c7ce01816a1.pdf [file c7ce01816a1.pdf]

## Electronic Supplementary Information

### Alkaline electrolyte: Toward high-quality CdTe films with the assistance of strong complexing agent and organic base

Yuxuan Zhang,<sup>a</sup> Weibing Wu,<sup>a\*</sup> Yueyi Liu,<sup>a</sup> Weijie Yang,<sup>a</sup> Wenwen Chen,<sup>a</sup> Jizuo Zhao

a. School of Materials science and Engineering, University of Jinan, 250022, P.R. China.

\* Corresponding author E\_mail: mse\_wuwb@ujn.edu.cn

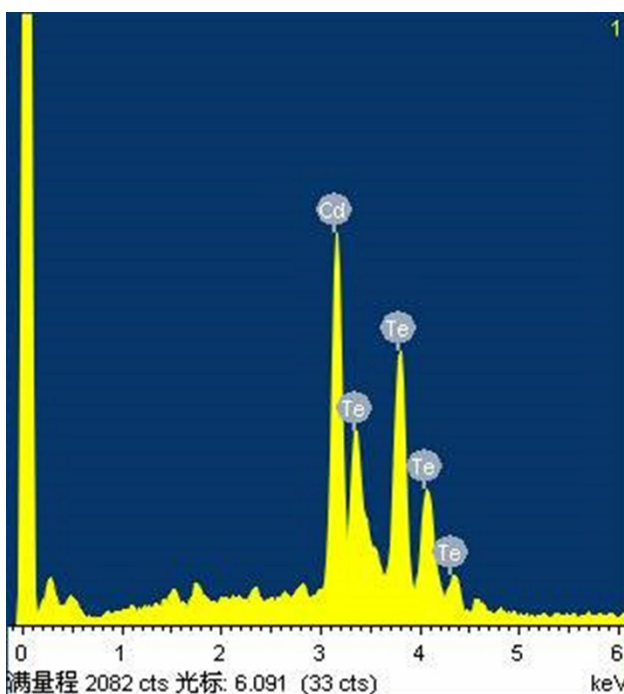

**Fig. S1.** The EDS results of the CdTe film electrodeposited at -0.50 V at 80 °C from the solution with the complexing ratio of 14:1.

**Table S1.** The EDS data of the CdTe film electrodeposited at -0.50 V at 80 °C from the solution with the complexing ratio of 14:1.

| element | Element | Intensity | Weight<br>percent | Weight%<br>Sigma | Atoms%<br>percent |
|---------|---------|-----------|-------------------|------------------|-------------------|
| Cd L    | 4.44    | 1.0021    | 46.77             | 0.81             | 49.94             |
| Te L    | 5.03    | 0.9969    | 53.23             | 0.81             | 50.06             |
| Total   |         |           | 100.00            |                  | 100               |

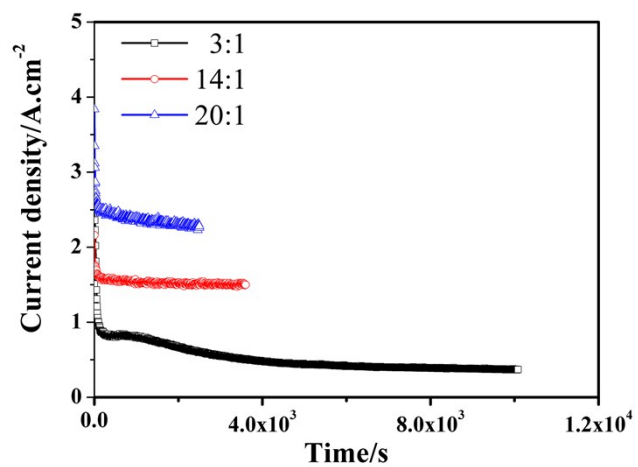

**Fig. S2.** The deposition current density-time curves of CdTe film from the solution with the complexing ratios of 3:1, 14:1, and 20:1, respectively.
